# Supplementary material
Source: PubMed Central journal article supplement (PMC3732041)
Supplement: NIHMS493682-supplement-01.pdf [file NIHMS493682-supplement-01.pdf]

Supplemental Table 1. Pearson correlation coefficients among all the measures: (a) P7 stage (N=75), (b) P21 stage (N=70 for Nasal, N=78 for all the others). All the results are significant with  $p < .0001$ .

| (a) P7: N = 75, $p < .0001$ for all the entries except no measures for Nasal      |         |          |           |          |       |       |          |          |
|-----------------------------------------------------------------------------------|---------|----------|-----------|----------|-------|-------|----------|----------|
|                                                                                   | Frontal | Parietal | Occipital | Mandible | Nasal | Skull | HeadSize | HeadCirc |
| Frontal                                                                           | 1.000   | 0.782    | 0.813     | 0.819    | .     | 0.788 | 0.645    | 0.540    |
| Parietal                                                                          | 0.782   | 1.000    | 0.905     | 0.852    | .     | 0.846 | 0.794    | 0.653    |
| Occipital                                                                         | 0.813   | 0.905    | 1.000     | 0.896    | .     | 0.874 | 0.763    | 0.623    |
| Mandible                                                                          | 0.819   | 0.852    | 0.896     | 1.000    | .     | 0.847 | 0.777    | 0.671    |
| Nasal                                                                             | .       | .        | .         | .        | .     | .     | .        | .        |
| Skull                                                                             | 0.788   | 0.846    | 0.874     | 0.847    | .     | 1.000 | 0.666    | 0.483    |
| HeadSize                                                                          | 0.645   | 0.794    | 0.763     | 0.777    | .     | 0.666 | 1.000    | 0.822    |
| HeadCirc                                                                          | 0.540   | 0.653    | 0.623     | 0.671    | .     | 0.483 | 0.822    | 1.000    |
| (b) P21: N=70 for Nasal, N=78 for all the others, $p < .0001$ for all the entries |         |          |           |          |       |       |          |          |
|                                                                                   | Frontal | Parietal | Occipital | Mandible | Nasal | Skull | HeadSize | HeadCirc |
| Frontal                                                                           | 1.000   | 0.666    | 0.723     | 0.723    | 0.611 | 0.785 | 0.797    | 0.665    |
| Parietal                                                                          | 0.666   | 1.000    | 0.790     | 0.590    | 0.406 | 0.763 | 0.759    | 0.634    |
| Occipital                                                                         | 0.723   | 0.790    | 1.000     | 0.648    | 0.539 | 0.797 | 0.756    | 0.656    |
| Mandible                                                                          | 0.723   | 0.590    | 0.648     | 1.000    | 0.638 | 0.785 | 0.724    | 0.722    |
| Nasal                                                                             | 0.611   | 0.406    | 0.539     | 0.638    | 1.000 | 0.568 | 0.494    | 0.493    |
| Skull                                                                             | 0.785   | 0.763    | 0.797     | 0.785    | 0.568 | 1.000 | 0.862    | 0.742    |
| HeadSize                                                                          | 0.797   | 0.759    | 0.756     | 0.724    | 0.494 | 0.862 | 1.000    | 0.813    |
| HeadCirc                                                                          | 0.665   | 0.634    | 0.656     | 0.722    | 0.493 | 0.742 | 0.813    | 1.000    |
